# Supplementary material
Source: publisher site journal article supplement (https://www.spandidos-publications.com/6043/downloadSupplementary)

Figure S1. Expression levels and prognostic values of MCMs in human LIHC. (A) Associations between the expression of MCM2, MCM3, MCM6 or MCM7 and tumor stage in patients with LIHC were analyzed using the GEPIA2 database. (B) Disease-free survival rates in patients with LIHC according to the expression levels of MCMs were analyzed using the GEPIA2 database. MCM, minichromosome maintenance proteins; LIHC, liver hepatocellular carcinoma Pr (>F), P-value of the F-statistic; HR, hazard ratio; p(HR), P-value for the HR.

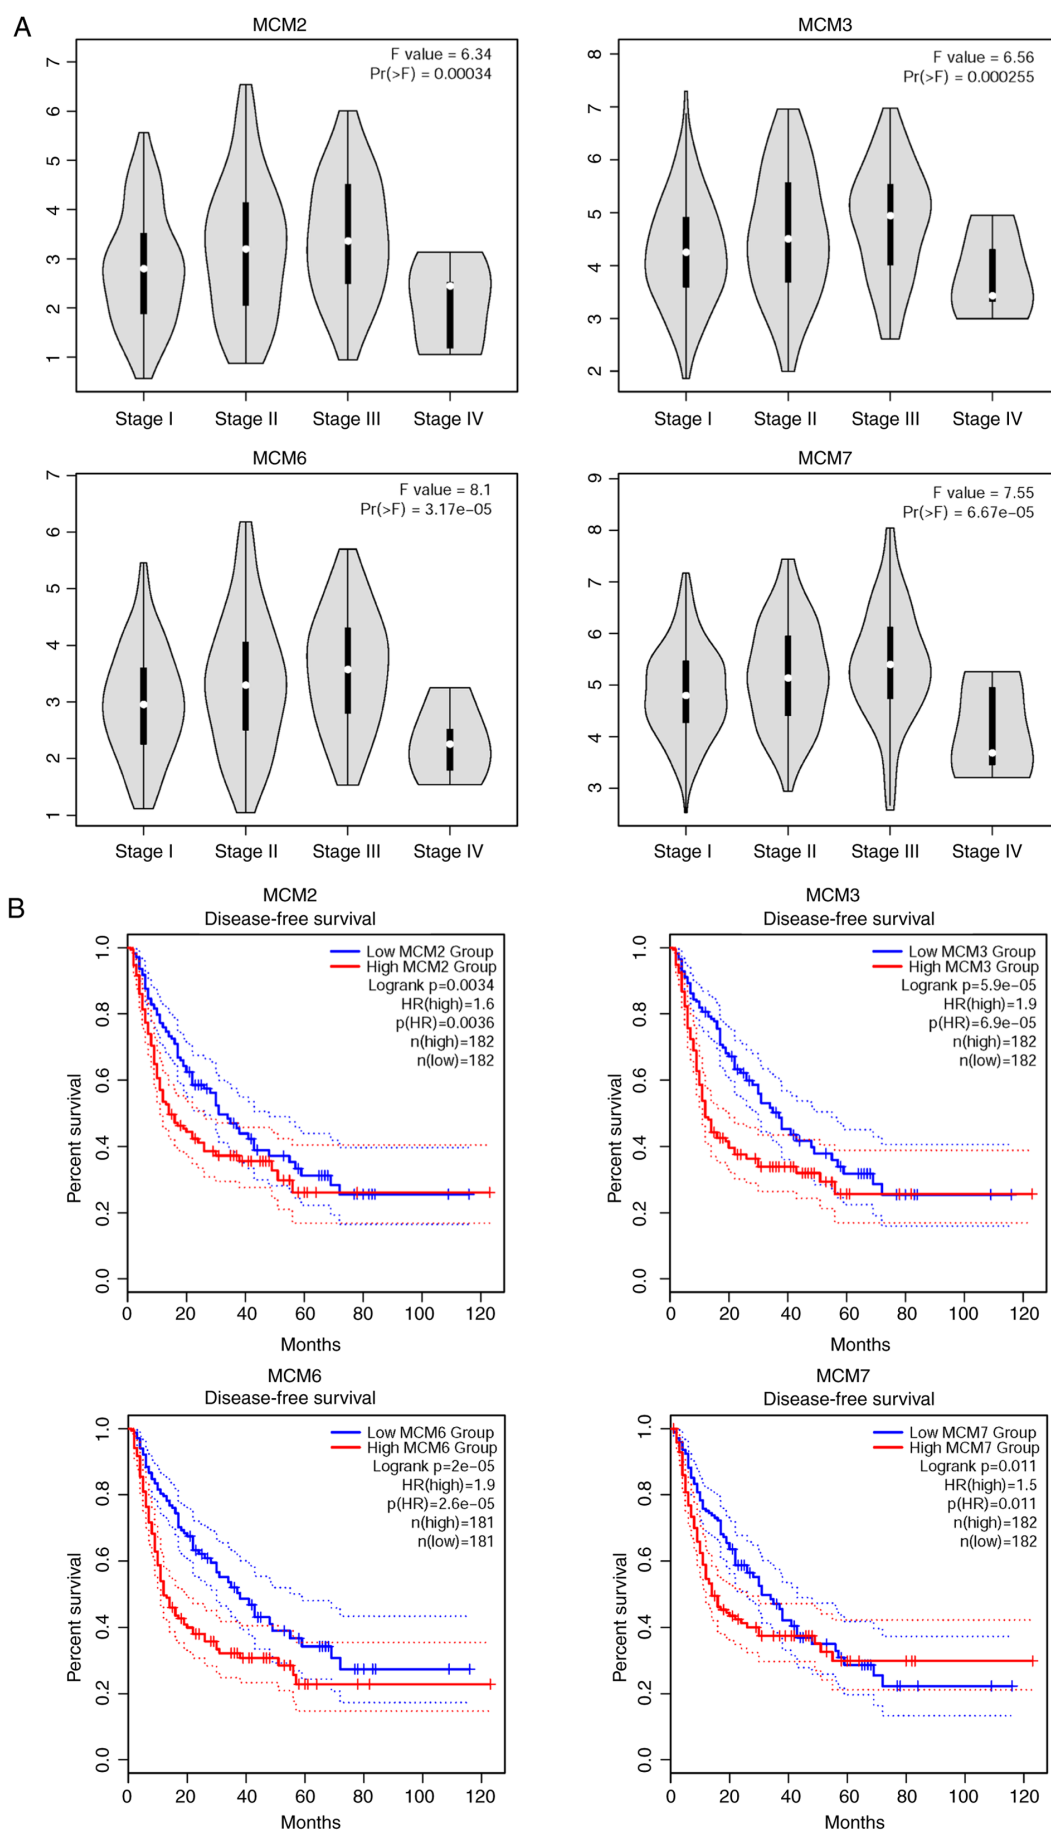

Supplement: Supplementary file 1 [file downloadSupplementary]
